# Supplementary material for: Cis-acting lnc-eRNA SEELA directly binds histone H4 to promote histone recognition and leukemia progression
Source: PubMed Central journal article supplement (PMC7607629; doi:10.1186/s13059-020-02186-x), 2020-11-03

**Complete western blot images of all figures**

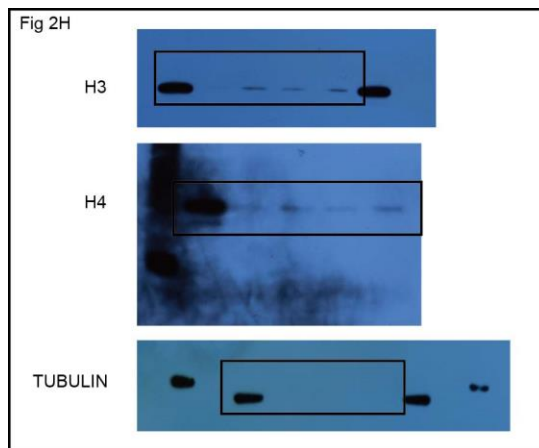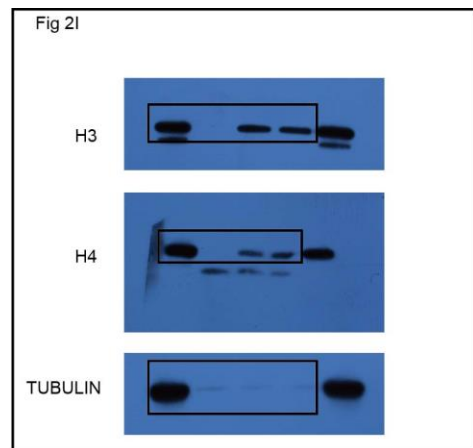

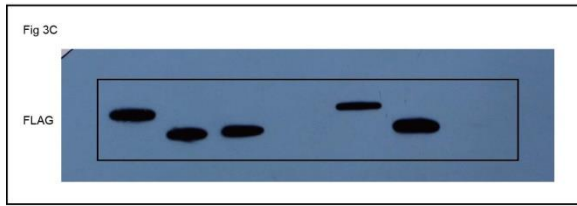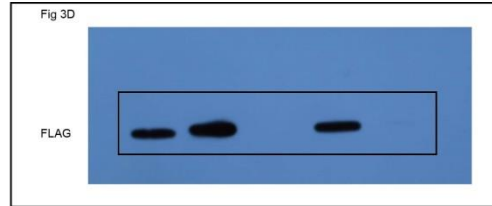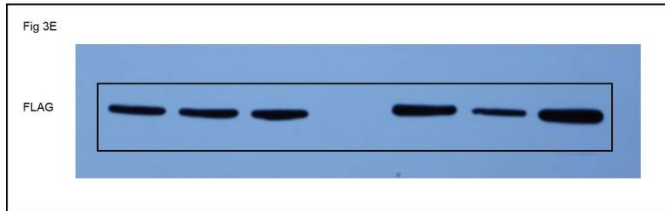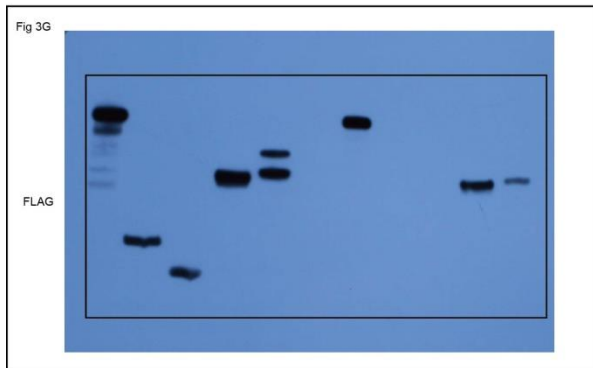

Fig 4E

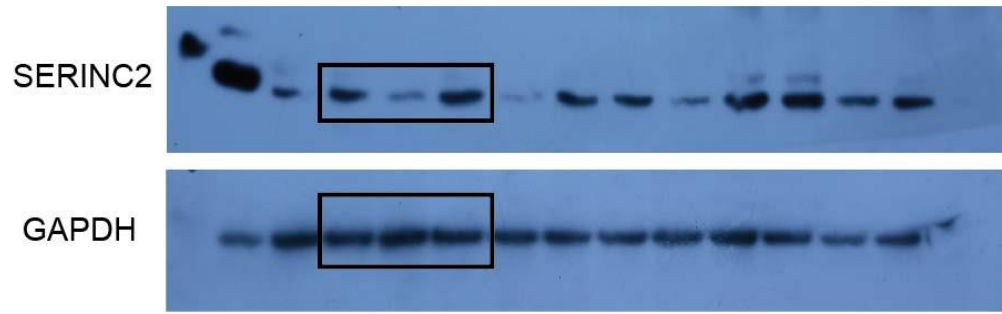

Fig 4F

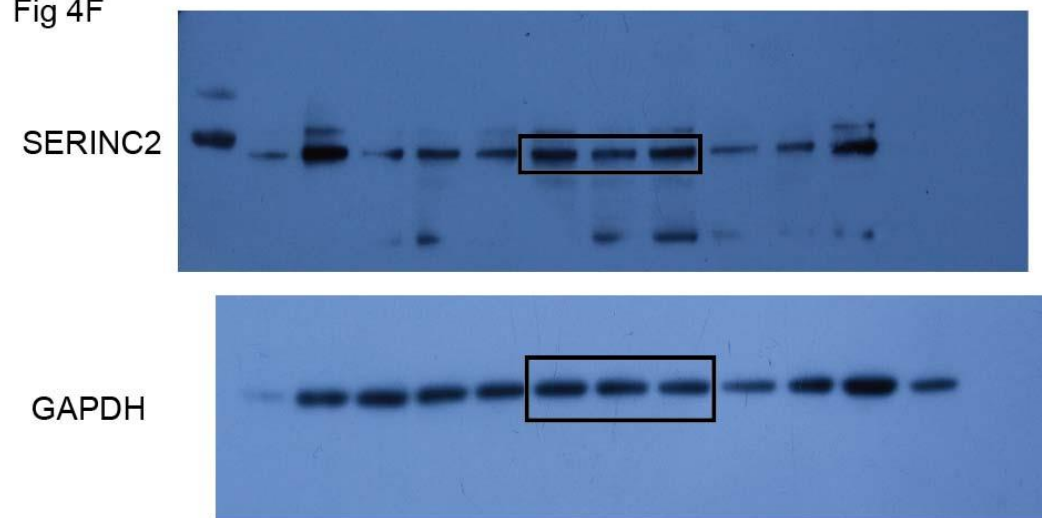

Fig 5E

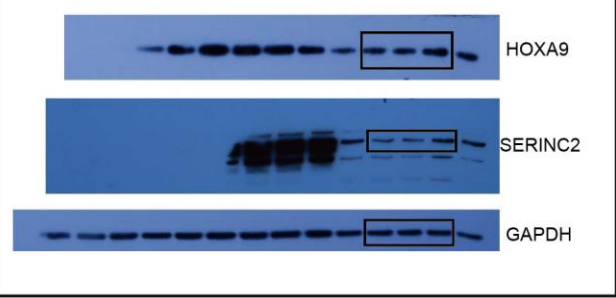

Fig 5F

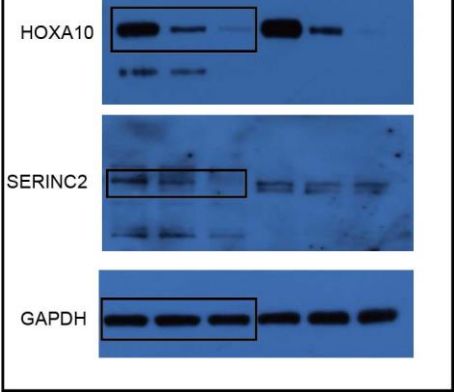

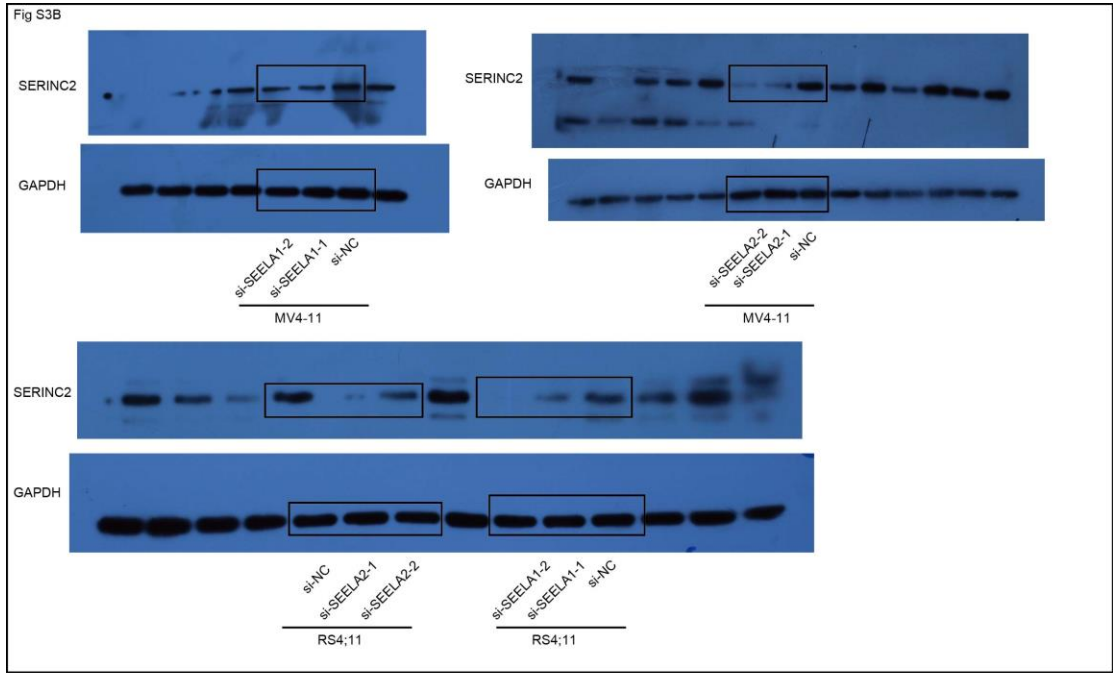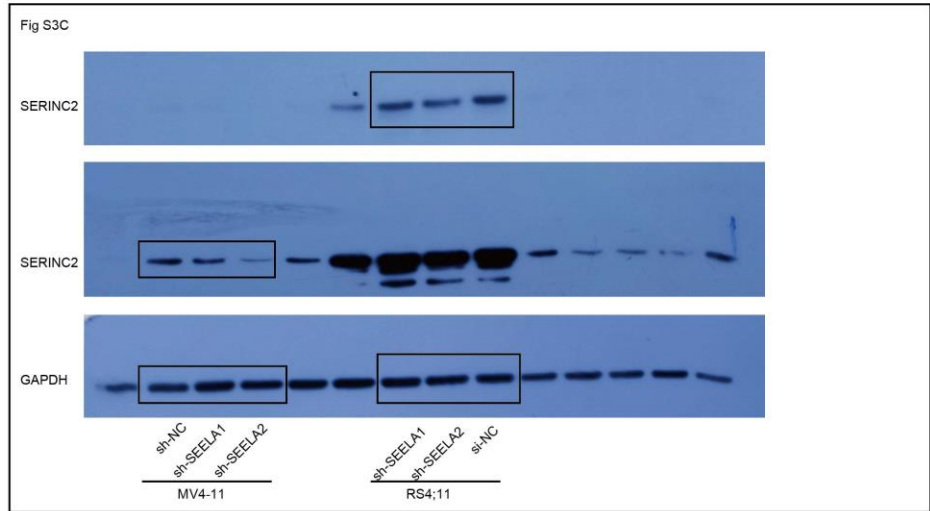

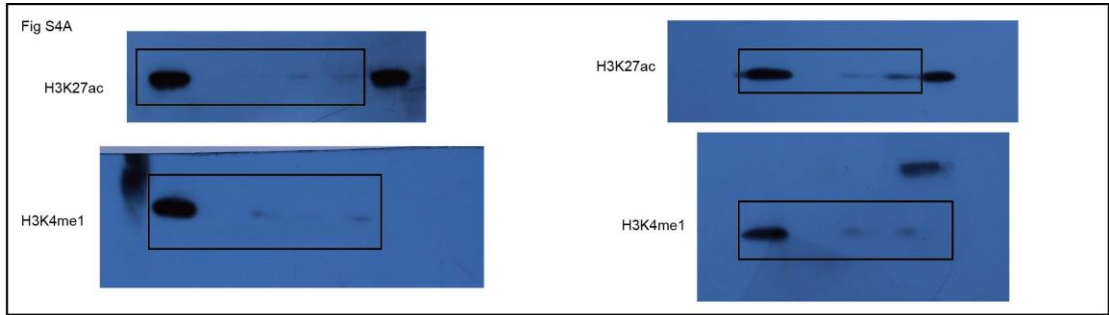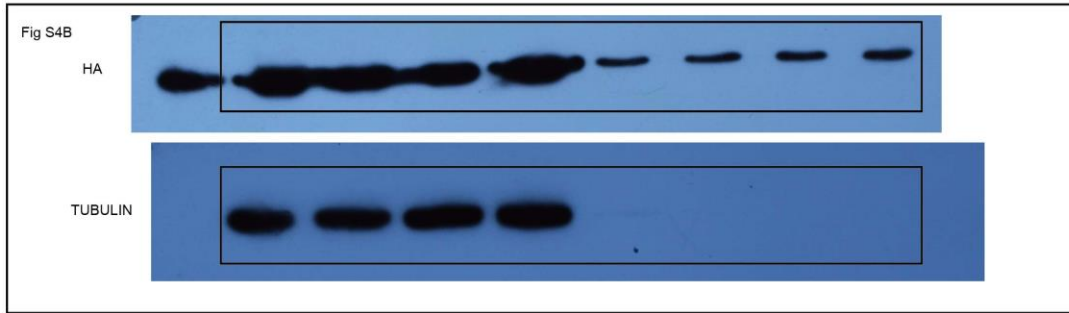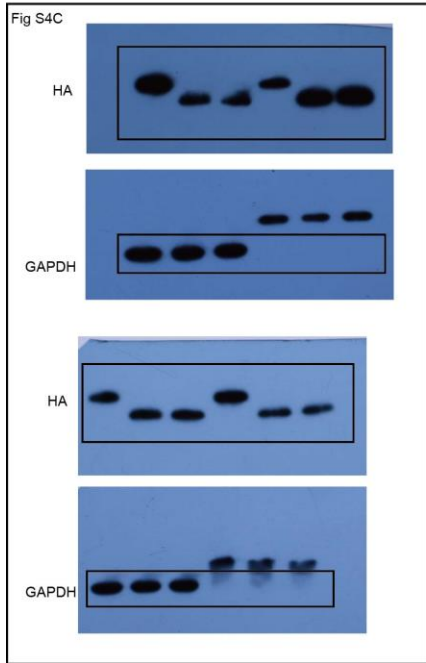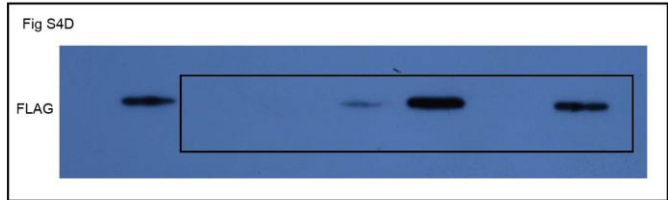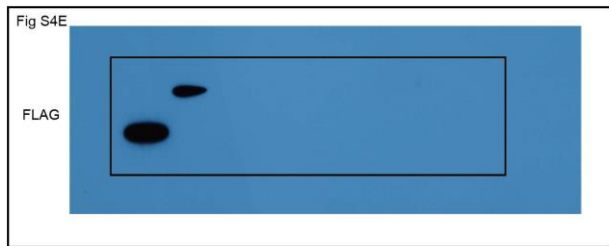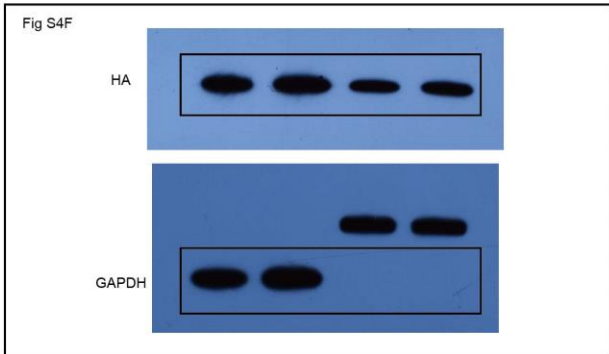

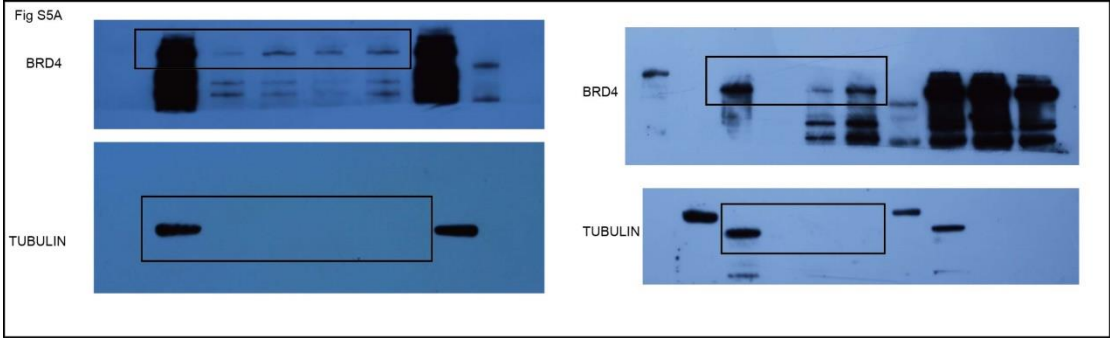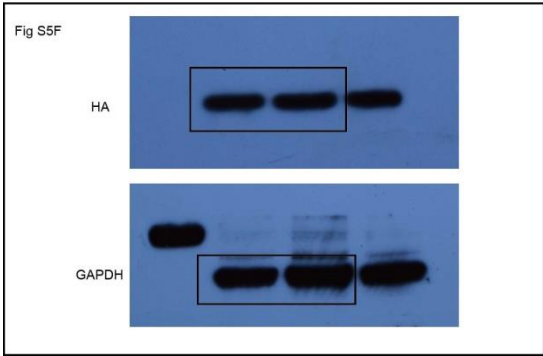

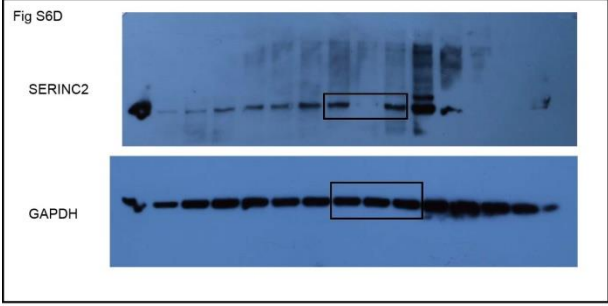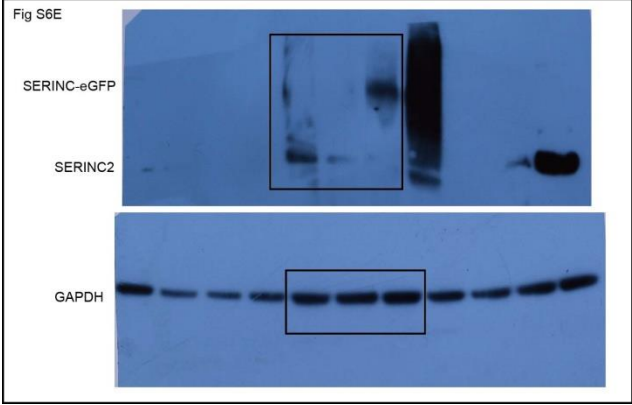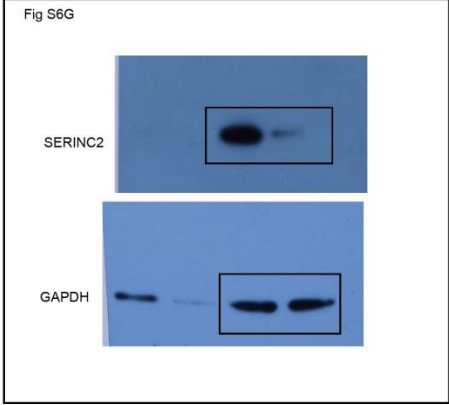

Supplement: 13059_2020_2186_MOESM8_ESM.pdf [file 13059_2020_2186_MOESM8_ESM.pdf]
