# Supplementary material for: Cis-acting lnc-eRNA SEELA directly binds histone H4 to promote histone recognition and leukemia progression
Source: PubMed Central journal article supplement (PMC7607629; doi:10.1186/s13059-020-02186-x), 2020-11-03
Supplement: 13059_2020_2186_MOESM4_ESM.pdf [file 13059_2020_2186_MOESM4_ESM.pdf]

**Table S3. The binding sites of HOXA9 in lnc-eRNAs loci**

| <b>PeakID</b>         | <b>Ch<br/>r</b> | <b>Start</b>  | <b>End</b>    | <b>Str<br/>and</b> | <b>Peak<br/>Score</b> | <b>Focus<br/>Ratio/Region<br/>Size</b> | <b>Lnc-eRNA</b>     |
|-----------------------|-----------------|---------------|---------------|--------------------|-----------------------|----------------------------------------|---------------------|
| <b>chr1-<br/>142</b>  | chr<br>1        | 319562<br>62  | 319564<br>98  | +                  | 43.4                  | 0.793                                  | SERINC2-ELA1        |
| <b>chr1-63</b>        | chr<br>1        | 319899<br>19  | 319901<br>55  | +                  | 80.2                  | 0.912                                  | SERINC2-ELA2        |
| <b>chr8-<br/>744</b>  | chr<br>8        | 669287<br>73  | 669290<br>09  | +                  | 14.9                  | 0.748                                  | DNAJC5B-ELA1        |
| <b>chr8-<br/>117</b>  | chr<br>8        | 668940<br>28  | 668942<br>64  | +                  | 81.3                  | 0.754                                  | DNAJC5B-ELA1        |
| <b>chr1-<br/>405</b>  | chr<br>1        | 198906<br>508 | 198906<br>744 | +                  | 26.2                  | 0.827                                  | MIR181A1HG-<br>ELA1 |
| <b>chr16-<br/>119</b> | chr<br>16       | 814648<br>92  | 814651<br>28  | +                  | 32.1                  | 0.92                                   | CMIP-ELA1           |
| <b>chr3-<br/>790</b>  | chr<br>3        | 197228<br>777 | 197229<br>013 | +                  | 16.2                  | 0.88                                   | BDH1-ELA1           |
| <b>chr4-<br/>122</b>  | chr<br>4        | 841616<br>90  | 841619<br>26  | +                  | 40.2                  | 0.706                                  | COQ2-ELA1           |
| <b>chr4-<br/>346</b>  | chr<br>4        | 841527<br>77  | 841530<br>13  | +                  | 17.2                  | 0.656                                  | COQ2-ELA1           |
| <b>chr13-<br/>208</b> | chr<br>13       | 512526<br>57  | 512528<br>93  | +                  | 18.9                  | 0.609                                  | DLEU7-ELA1          |
| <b>chr1-<br/>2282</b> | chr<br>1        | 279449<br>22  | 279451<br>58  | +                  | 10.2                  | 0.8                                    | FGR-ELA1            |
| <b>chr1-<br/>2116</b> | chr<br>1        | 279516<br>21  | 279518<br>57  | +                  | 11.1                  | 0.898                                  | FGR-ELA1            |
| <b>chr1-<br/>962</b>  | chr<br>1        | 279526<br>55  | 279528<br>91  | +                  | 16.6                  | 0.875                                  | FGR-ELA1            |
| <b>chr13-<br/>482</b> | chr<br>13       | 240345<br>57  | 240347<br>93  | +                  | 15.5                  | 0.804                                  | SACS-ELA1           |
| <b>chr13-<br/>274</b> | chr<br>13       | 240365<br>85  | 240368<br>21  | +                  | 20.2                  | 0.75                                   | SACS-ELA1           |
| <b>chr5-<br/>6607</b> | chr<br>5        | 880145<br>89  | 880148<br>25  | +                  | 7.66                  | 0.733                                  | MEF2C-ELA1          |
| <b>chr5-<br/>2493</b> | chr<br>5        | 880564<br>20  | 880566<br>56  | +                  | 10.2                  | 0.764                                  | MEF2C-ELA1          |
| <b>chr5-<br/>3902</b> | chr<br>5        | 883599<br>59  | 883601<br>95  | +                  | 8.93                  | 0.7                                    | MEF2C-ELA1          |
| <b>chr5-<br/>5792</b> | chr<br>5        | 884140<br>90  | 884143<br>26  | +                  | 8.3                   | 0.83                                   | MEF2C-ELA1          |
| <b>chr5-<br/>5792</b> | chr<br>5        | 885896<br>90  | 885899<br>26  | +                  | 72.3                  | 0.887                                  | MEF2C-ELA1          |

|                  |          |               |               |   |       |       |              |
|------------------|----------|---------------|---------------|---|-------|-------|--------------|
| <b>109</b>       | 5        | 70            | 06            |   |       |       |              |
| <b>chr5-382</b>  | chr<br>5 | 885989<br>44  | 885991<br>80  | + | 26.8  | 0.801 | MEF2C-ELA1   |
| <b>chr5-29</b>   | chr<br>5 | 886043<br>91  | 886046<br>27  | + | 150.4 | 0.985 | MEF2C-ELA1   |
| <b>chr5-187</b>  | chr<br>5 | 886925<br>92  | 886928<br>28  | + | 45.1  | 0.872 | MEF2C-ELA1   |
| <b>chr1-1</b>    | chr<br>1 | 121485<br>084 | 121485<br>320 | + | 5820  | 0.668 | SRGAP2C-ELA1 |
| <b>chr1-87</b>   | chr<br>1 | 121200<br>604 | 121200<br>840 | + | 62.3  | 0.934 | SRGAP2C-ELA1 |
| <b>chr1-447</b>  | chr<br>1 | 121478<br>545 | 121478<br>781 | + | 45.7  | 0.991 | SRGAP2C-ELA1 |
| <b>chr1-800</b>  | chr<br>1 | 121355<br>623 | 121355<br>859 | + | 29.6  | 0.875 | SRGAP2C-ELA1 |
| <b>chr1-694</b>  | chr<br>1 | 121357<br>900 | 121358<br>136 | + | 23.6  | 0.982 | SRGAP2C-ELA1 |
| <b>chr1-2871</b> | chr<br>1 | 121386<br>185 | 121386<br>421 | + | 10.8  | 0.981 | SRGAP2C-ELA1 |
| <b>chr1-2345</b> | chr<br>1 | 121258<br>442 | 121258<br>678 | + | 9.36  | 0.785 | SRGAP2C-ELA1 |
| <b>chr1-3086</b> | chr<br>1 | 121225<br>793 | 121226<br>029 | + | 6.38  | 0.648 | SRGAP2C-ELA1 |
| <b>chr5-355</b>  | chr<br>5 | 964173        | 964409        | + | 25.3  | 0.672 | NKD2-ELA1    |
| <b>chr5-630</b>  | chr<br>5 | 976733        | 976969        | + | 25.3  | 0.992 | NKD2-ELA1    |
| <b>chr5-731</b>  | chr<br>5 | 997426        | 997662        | + | 18.9  | 0.823 | NKD2-ELA1    |
| <b>chr2-4224</b> | chr<br>2 | 285894<br>09  | 285896<br>45  | + | 6.59  | 0.821 | BRE-ELA1     |
| <b>chr9-2514</b> | chr<br>9 | 684556<br>52  | 684558<br>88  | + | 6.59  | 0.875 | FRGIJP-ELA1  |
| <b>chr3-1090</b> | chr<br>3 | 113308<br>35  | 113310<br>71  | + | 10.8  | 0.617 | ATG7-ELA1    |
| <b>chr3-1531</b> | chr<br>3 | 113457<br>33  | 113459<br>69  | + | 10    | 0.783 | ATG7-ELA1    |
