# Supplementary material for: Cis-acting lnc-eRNA SEELA directly binds histone H4 to promote histone recognition and leukemia progression
Source: PubMed Central journal article supplement (PMC7607629; doi:10.1186/s13059-020-02186-x), 2020-11-03
Supplement: 13059_2020_2186_MOESM5_ESM.pdf [file 13059_2020_2186_MOESM5_ESM.pdf]

**Table S4. Clinical characteristics of all samples in the study**

|                                      | <i>MLL-r</i> (N=26) |        | <i>MLL-wt</i> (N=75) |        |
|--------------------------------------|---------------------|--------|----------------------|--------|
|                                      | median(range)       | No.(%) | median(range)        | No.(%) |
| <b>Age at diagnosis, years</b>       | 3(0.33-13.0)        |        | 6(1.3-13.0)          |        |
| <b>Sex</b>                           |                     |        |                      |        |
| <b>Male</b>                          | 15(57.7)            |        | 38(50.7)             |        |
| <b>Female</b>                        | 10(38.5)            |        | 24(32.0)             |        |
| <b>N/A</b>                           | 1(3.8)              |        | 13(17.3)             |        |
| <b>Immunophenotype</b>               |                     |        |                      |        |
| <b>B</b>                             | 19(73.1)            |        | 31(41.3)             |        |
| <b>T</b>                             | 6(23.1)             |        | 17(22.7)             |        |
| <b>N/A</b>                           | 1(3.8)              |        | 27(36.0)             |        |
| <b>WBC count, x 10<sup>9</sup>/L</b> | 74.00(2.75-162.00)  |        | 34.10(2.00-632.47)   |        |
| <b>Risk group</b>                    |                     |        |                      |        |
| <b>H</b>                             | 10(38.5)            |        | 22(29.3)             |        |
| <b>M</b>                             | 8(30.8)             |        | 20(26.7)             |        |
| <b>S</b>                             | 1(3.8)              |        | 5(6.7)               |        |
| <b>N/A</b>                           | 7(26.9)             |        | 28(37.3)             |        |
