# Supplementary material for: Cis-acting lnc-eRNA SEELA directly binds histone H4 to promote histone recognition and leukemia progression
Source: PubMed Central journal article supplement (PMC7607629; doi:10.1186/s13059-020-02186-x), 2020-11-03
Supplement: 13059_2020_2186_MOESM7_ESM.pdf [file 13059_2020_2186_MOESM7_ESM.pdf]

**Table S6. Antibodies used in the research**

| <b>Antibodies</b>                      | <b>Source</b>             | <b>Identifier</b>            |
|----------------------------------------|---------------------------|------------------------------|
| <b>Anti-SERINC2</b>                    | Novus Biologicals         | NBP1-60102, RRID:AB_11009118 |
| <b>Anti-FLAG</b>                       | Sigma                     | F7425, RRID:AB_439687        |
| <b>Anti-HA</b>                         | Cell Signaling Technology | #3724, RRID:AB_1549585       |
| <b>Anti-GST</b>                        | Cell Signaling Technology | #2624, RRID:AB_2189875       |
| <b>Anti-IgG</b>                        | Cell Signaling Technology | #2729, RRID:AB_1031062       |
| <b>Anti-IgG</b>                        | Sigma                     | M8642, RRID:AB_260698        |
| <b>Anti-GAPDH</b>                      | Proteintech               | 10494-1-AP, RRID:AB_2263076  |
| <b>Anti-<math>\beta</math>-tubulin</b> | Invitrogen                | 32-2600, RRID:AB_86547       |
| <b>Anti-H3</b>                         | Abcam                     | ab1791 , RRID:AB_302613      |
| <b>Anti-H4</b>                         | Abcam                     | ab7311 , RRID:AB_305837      |
| <b>Anti-H3K27ac</b>                    | Abcam                     | ab4729 , RRID:AB_2118291)    |
| <b>Anti-H3K4me1</b>                    | Cell Signaling Technology | #5326, RRID:AB_10695148      |
| <b>Anti-H3K4me3</b>                    | Cell Signaling Technology | #9751, RRID:AB_2616028       |
| <b>Anti-HOXA9</b>                      | Proteintech               | 18501-1-AP                   |
| <b>Anti-HOXA10</b>                     | Santa Cruz Biotechnolog   | sc-271428 , RRID:AB_10649855 |
| <b>Anti-BRD4</b>                       | Cell Signaling Technology | 13440, RRID:AB_2687578       |
| <b>Anti-POL II</b>                     | Millipore                 | 05-623 , RRID:AB_309852      |
| <b>Anti-MLL1</b>                       | Bethyl                    | A300-086A , RRID:AB_242510   |
| <b>Anti-m7G</b>                        | MBL                       | RN017M, RRID:AB_2725740      |
